---

## 2 Low sperm to egg ratio required for successful *in vitro* fertilisation in a 3 pair-spawning teleost, Senegalese sole (*Solea senegalensis*)

4 Sandra Ramos-Júdez<sup>1=</sup>, Wendy Ángela González-López<sup>1=</sup>, Jhons Huayanay Ostos<sup>1</sup>,  
5 Noemí Cota Mamani<sup>2</sup>, Carlos Marrero Alemán<sup>1</sup>, José Beirão<sup>3</sup>, Neil Duncan<sup>1\*</sup>

6 <sup>1</sup> IRTA, Sant Carles de la Ràpita Ctra. de Poble Nou km. 5.5, 43540 Sant Carles de la Ràpita, Tarragona, Spain.

7 <sup>2</sup> Dirección General de Investigaciones en Acuicultura, Instituto del Mar del Perú (IMARPE), Lima, Peru

8 <sup>3</sup> Faculty of Biosciences and Aquaculture, Nord University, NO-8049 Bodø, Norway

---

### Abstract

10 Cultured Senegalese sole (*Solea senegalensis*) breeders fail to spawn fertilised eggs and  
11 this bottleneck could be solved with the implementation of large-scale *in vitro* fertilisation  
12 protocols. However, low production of poor-quality sperm has frustrated the development  
13 of *in vitro* fertilisation protocols. Cultured females were induced to ovulate with a 5 µg  
14 kg<sup>-1</sup> single injection of gonadotropin releasing hormone agonist (GnRHa) and good  
15 quality eggs (82.6 ± 9.2% fertilisation) were stripped 41:57 ± 1:46 h after the injection.  
16 Sperm was collected from cultured males, diluted in modified Leibovitz and used fresh  
17 to fertilise the eggs. A non-linear regression, an exponential rise to a maximum (R = 0.93,  
18 P < 0.0001) described the number of motile spermatozoa required to fertilise a viable egg  
19 and 1617 motile spermatozoa were sufficient to fertilise 99 ± 12% (± 95% CI) of viable  
20 eggs. Similar, spermatozoa egg<sup>-1</sup> ratios of 592 ± 611 motile spermatozoa egg<sup>-1</sup> were used  
21 in large-scale *in vitro* fertilisations with 190,512 ± 38,471 eggs. The sperm from a single  
22 male (145 ± 50 µL or 8.0 ± 6.8 × 10<sup>8</sup> spermatozoa) was used to fertilise the eggs. The  
23 mean hatching rate of the large-scale *in vitro* fertilisations was 70 ± 14 % to provide  
24 131,540 ± 34,448 larvae per fertilisation. When unfertilised eggs were stored at room  
25 temperature the percentage of viable eggs decreased gradually and indicated the sooner  
26 eggs were fertilised after stripping the higher the viability of the eggs. The collection of  
27 sperm directly into a syringe containing modified Leibovitz significantly increased the  
28 percentage of motile spermatozoa (33.4 ± 12.2 %) compared to dilution in modified  
29 Leibovitz immediately after collection (6.6 ± 4.9 %). Senegalese sole have a pair-  
30 spawning reproductive behaviour characterised by external gamete fertilisation in close  
31 proximity with no sperm competition. The low spermatozoa egg<sup>-1</sup> ratio required for  
32 maximum fertilisation was consistent with this reproductive behaviour and strategy. The  
33 provision of a large-scale *in vitro* fertilisation protocol (200 µL of sperm per 100 mL of  
34 eggs) will enable the industry to operate sustainably and implement breeding programs  
35 to improve production.

36 **Keywords:** Flatfish, Teleost, Aquaculture, Gamete, Artificial fertilisation, Assisted reproduction

---

37 = These two authors made a similar contribution to the article.

38 \* Corresponding author: Neil Duncan, Email: [neil.duncan@irta.cat](mailto:neil.duncan@irta.cat), Tel.: +34 977 745427 extension: 1815

## 1. Introduction

40 Senegalese sole (*Solea senegalensis*) is a promising emerging aquaculture species in  
41 Europe. Sole production from land based farms in Spain, Portugal, France and Iceland  
42 has increased rapidly to 1,700 t in 2019 (APROMAR, 2019). This increase is driven by  
43 good market prices, high market demand and successful culture practices (Morais et al.,  
44 2016) that permit cost effective production despite of the need for high levels of  
investment in culture infrastructure.

46 However, the production cycle is not fully controlled and relies on the capture of wild  
47 broodstock that spawn sufficient eggs to achieve targeted aquaculture productions  
48 (Anguis and Cañavate, 2005; Martín et al., 2014). The progeny of these wild broodstock  
49 and in particular the males exhibit a reproductive behavioural dysfunction and do not  
50 participate in the courtship to fertilise eggs (Duncan et al., 2019; Fatsini et al., 2020;  
51 Guzmán et al., 2008; Martín et al., 2020). Consequentially, cultured broodstocks that were  
52 reared entirely in captivity produce unfertilised eggs (Duncan et al., 2019; Guzmán et al.,  
53 2008). Differences between wild and cultured breeders have suggested that the  
54 reproductive dysfunction has a bases in a combination of endocrine reproductive control  
55 (Guzmán et al., 2011; Riesco et al., 2019), social conditions during rearing (Fatsini et al.,  
56 2020; Martín et al., 2020), broodstock nutrition (Norambuena et al., 2013a, 2013b, 2012b,  
57 2012c, 2012a) and olfactory capacity (Fatsini et al., 2017). However, no practical  
58 approach has been developed to overcome these reproductive dysfunctions and the low  
levels of fertilised egg obtained from cultured broodstocks (Fatsini et al., 2020; Guzmán  
60 et al., 2011) were insufficient to meet industry needs.

In flatfish culture, *in vitro* fertilisation methods are commonly used to obtain the fertilised  
62 eggs required for aquaculture (Mañanós et al., 2008). *In vitro* fertilisation enables  
63 aquaculturists to bypass behavioural reproductive dysfunctions of the type observed in  
64 cultured male Senegalese sole. However, the application of *in vitro* fertilisation methods  
65 for Senegalese sole has been frustrated by the small quantities of poor quality sperm  
66 produced by males (Beirão et al., 2011, 2009; Cabrita et al., 2011, 2006; González-López  
67 et al., 2020). Rasines et al. (2013, 2012), has described *in vitro* fertilisation procedures  
68 for Senegalese sole on an experimental scale. Female sole were induced to ovulate with  
gonadotropin releasing hormone agonist (GnRHa) and batches of 1 mL of stripped eggs  
69 were fertilised with 30  $\mu$ L of cryopreserved sperm from cultured males. Similarly, Liu  
70 et al. (2008) described *in vitro* fertilisation of Senegalese sole eggs on an industrial scale.  
71 Again, eggs were obtained from GnRHa induced cultured females and all the eggs from  
each female were fertilised *in vitro* with the sperm from three to four cultured males.  
74 However, few details were given on the amount of sperm or eggs used and the  
spermatozoa (spz) to egg ratio was not detailed.

76 When sperm is limiting, it is of critical importance to know the spz to egg ratio (amount  
of spz required to fertilise each egg) to plan *in vitro* fertilisation procedures. Spermatozoa  
78 to egg ratios for *in vitro* fertilisation of fish eggs show considerable variation ranging  
from  $\times 10^3$  to  $\times 10^6$  (Beirão et al., 2019). However, it would appear that flatfish have  
80 lower spz requirements as winter flounder (*Pseudopleuronectes americanus*) required  $3.4$   
 $\times 10^4$  spz egg<sup>-1</sup> (Butts et al., 2012) and turbot (*Scophthalmus maximus*) required just 3000  
82 to 6000 spz egg<sup>-1</sup> (Chereguini et al., 1999; Suquet et al., 1995). Many flatfish species have  
reproductive strategies and behaviours to spawn as a pair (Carazo et al., 2016; Gibson et  
84 al., 2014). Monogamous fish species (classified as species that spawn in a pair) were  
shown to have smaller testes compared to polyandrous species (group spawning of males  
86 with a female) (Baker et al., 2020). Monogamy or pair-spawning will also reduce sperm

88 competition (sperm from two or more males compete to fertilise the eggs) and decreasing  
sperm competition has been related to smaller testes and lower sperm production (Parker  
and Pizzari, 2010; Stockley et al., 1997). Senegalese sole spawn as pairs (Carazo et al.,  
90 2016; Duncan et al., 2019) and spawning pairs show a degree fidelity during and between  
spawning seasons (Fatsini et al., 2020; Martín et al., 2014). Therefore, pair-spawning and  
92 low sperm competition would appear to explain the small testes size (García-López et al.,  
2005; González-López et al., 2020) and low sperm production reported for Senegalese  
94 sole (Beirão et al., 2011, 2009; Cabrita et al., 2011, 2006; González-López et al., 2020).  
In addition, a preliminary study found that Senegalese sole achieved a high percentage of  
96 fertilisation with a low spz to egg ratio (Marrero-Alemán et al., 2019) and indicated that  
*in vitro* fertilisation with the low numbers of sperm may be a viable solution to the  
98 industries problem to control the reproduction.

The present study, aimed to determine the spz to egg ratio required for *in vitro* fertilisation  
100 in Senegalese sole. The first aim was to determine the sperm to egg ratio on an  
experimental scale and then use similar ratios for commercial large-scale *in vitro*  
102 fertilisations as a proof-of-concept. Additional aims were, to determine the viability of  
ovulated eggs stored at room temperature and to improve sperm collection methods.

## 104 **2. Methods**

### **2.1 Experimental animals**

106 All Senegalese sole broodstock used were cultured fish that had been hatched and reared  
entirely in captivity. Females used had an average weight of  $1.53 \pm 0.28$  kg and males  
108 had a weight of  $1.05 \pm 0.25$  kg. Fish were maintained in 10,000 L tanks in IRTA Sant  
Carles de la Rápita (Catalonia, Spain). Prior to experiments, fish were held in surface sea  
110 water ( $\sim 35$  ppt,  $>5$  mg.L<sup>-1</sup> O<sub>2</sub>) and a controlled natural temperature cycle (9-20 °C) using  
recirculation systems (IRTAmor®). Tanks were covered with shade netting and  
112 photoperiod was natural with natural light. The fish were fed four days a week with either  
unfrozen polychaetes and mussels (0.75 % of biomass) or 5 mm pelleted Broodfeedlean  
114 broodstock diet (0.55% of biomass) (Sparos, Olhão, Portugal). During experiments  
conducted from April to June, fish were held in the same conditions with the exceptions  
116 that water temperature was maintained at a constant  $16 \pm 1$  °C and fish were not feed 24  
hours before any manipulation.

118 The fish were handled (routine husbandry and experimentation) in accordance with  
European regulations on animal welfare (Federation of Laboratory Animal Science  
120 Associations, FELASA, <http://www.felasa.eu/>). For all handling and sampling, fish were  
anesthetised with 60 mg L<sup>-1</sup> tricaine methanesulfonate (MS-222; Sigma-Aldrich, Spain).

### 122 **2.2 Gametes**

Eggs were obtained by inducing ovulation. Ovarian biopsies were taken from females  
124 with swollen ovaries and the diameter of 20 oocytes were measured (x40 Carl Zeiss  
Axiostar microscope). Females were selected that had mean oocyte diameter  $\geq 600$   $\mu$ m  
126 (Marrero-Alemán et al., 2019). The females were administered 5  $\mu$ g kg<sup>-1</sup> of GnRH $\alpha$   
(Sigma code L4513, Sigma, Spain) (Agulleiro et al., 2006) between 18:00 to 19:00 h. The  
128 females were held with constant temperature ( $16 \pm 1$  °C) and total darkness until  
ovulation. Females were checked for ovulation every 2-3 hours starting from 40 h after  
130 the administration of GnRH $\alpha$  (Marrero-Alemán et al., 2019; Rasines et al., 2013, 2012)  
and all eggs were stripped from the ovulated females. Percentage fertilisation when spz  
132 were in excess was used to indicate egg quality.

134 Sperm was obtained from males by repeatedly, gently massaging the testes and applying  
pressure along the full length of the sperm ducts to the urogenital pore. All sperm with  
136 urine contamination was collected in a 1 mL syringe. González-López et al. (2020),  
demonstrated that avoiding urine contamination was almost impossible and that high  
138 numbers of motile spz were obtained stripping sperm mixed with urine. The volume  
collected was measured with the syringe to an accuracy of 10  $\mu\text{L}$  and the sperm was  
140 transferred to a 1.5 mL Eppendorf and immediately diluted with modified Leibovitz  
(González-López et al., 2020) using the dilution required for the experiment (see below).  
142 The sperm motility was initially observed (x 100 Carl Zeiss Axiostar microscope) by  
activating 1  $\mu\text{L}$  of diluted sperm with 19  $\mu\text{L}$  of clean seawater. Sperm samples with low  
or no motility were rejected. All sperm samples were stored over ice or at 4°C  
144 (refrigerated) until analysis or used to fertilise eggs.

The spz concentration (spz  $\text{mL}^{-1}$ ) was measured using a Thoma cell counting chamber. A  
146 10  $\mu\text{L}$  sample of sperm was diluted 1:500 in 10% formalin and 10  $\mu\text{L}$  of the dilution was  
pipetted into the counting chamber. After 10 minutes for spz to sediment, the chamber  
148 was observed using a microscope (x100 magnification with Olympus BH microscope),  
photographed (IC Capture software and GigE digital camera model: DMK 22BUC03  
150 Monochrome, The Imaginsource, Bremen, Germany) and the number of spz counted  
(ImageJ software, <http://imagej.nih.gov/ij/>).

152 Sperm motility parameters were determined as described by González-López et al.  
(2020). Spermatozoa were activated by mixing 1  $\mu\text{L}$  of diluted sperm (1:4 with modified  
154 Leibovitz) with 20  $\mu\text{L}$  of seawater with 30% bovine serum albumin (BSA, Sigma, Spain).  
One  $\mu\text{L}$  of activated sperm was pipetted into an ISAS R2C10 counting chamber (Proiser  
156 R+D, S.L. Paterna, Spain) previously mounted and focused on the microscope (200x  
magnification Olympus BH). Video recording was initiated when spz were activated and  
158 tracks were recorded (IC Capture software and GigE digital camera) until motion ceased.  
Videos (AVI format) of spz tracks from 15 to 17 s (unless otherwise stated) after  
160 activation were converted into image sequences (jpeg format using Virtual Dub 1.10.4  
software <http://www.virtualdub.org/>). The image sequences were analysed using ImageJ  
162 software with the computer-assisted sperm analysis (CASA) plugin (ImageJ  
<http://rsb.info.nih.gov/ij/plugins/>) using the settings: brightness and contrast, -10 to  
164 15/224 to 238; threshold, 0/198 to 202; minimum sperm size (pixels), 10; maximum  
sperm size (pixels), 400; minimum track length (frames), 10; maximum sperm velocity  
166 between frames (pixels), 30; frame rate, 30; microns/1000 pixels, 303; Print motion, 1;  
the additional settings were not modified. The parameters, percentage of motile spz (%  
168 motility), Curvilinear Velocity (VCL,  $\mu\text{m/s}$ ) and Average Path Velocity (VAP,  $\mu\text{m/s}$ )  
were recorded. All sperm samples were analysed in triplicate.

170 The experiments (unless otherwise stated) aimed to use gametes (eggs and sperm) as soon  
as possible after collection to avoid possible losses of viability due to storage. Researchers  
172 worked as two groups to strip eggs and sperm at the same time and complete *in vitro*  
fertilisations soon afterwards.

### 174 **2.3 Spermatozoa to egg ratio experiment**

Five different females and five different males were used during this experiment. When  
176 an ovulated female was encountered, sperm was collected and checked to find a male  
with  $\geq 300 \mu\text{L}$  of sperm that exhibited motility. The sperm was serially diluted with  
178 modified Leibovitz (González-López et al., 2020) to achieve eight dilutions: 1:4; 1:19;  
1:79; 1:319; 1:959; 1:2879; 1:5759; 1:11519. A sample of the first dilution (1:4) was used

180 to determine the spz concentration and percentage motility. The spz concentration in the  
182 dilution 1:4 was used to calculate the spz concentration in each dilution and spz motility  
184 to calculate the concentration of motile spz. The eggs and diluted sperm were used to  
186 make three triplicate fertilisations for each serial dilution. Fertilisations were made in 100  
188 mL beakers by pipetting in close sequence, 0.5 mL of eggs, 20  $\mu$ L of diluted sperm and  
190 5 mL clean seawater. A 1 mL pipette with a cut tip was used to pipette eggs and a 100  $\mu$ L  
192 pipette with a cut tip was used to pipette diluted sperm. The eggs, sperm and seawater  
were gently mixed by rocking and swirling the beaker. After 3-5 minutes, the volume of  
seawater was topped up to 100 mL. The beakers of fertilised eggs were transferred to a  
16 °C incubator. After 24 hours the eggs from each beaker were concentrated in a sieve  
and placed in a 10 mL Bogorov camber and  $\geq 50$  eggs were randomly examined using a  
binocular microscope (Nikon C-DSS230) to determine the number of developing eggs.  
In addition, the number of eggs in three 0.5 mL samples was counted for each female.

#### 2.4 Proof-of-concept experiment

194 Seven different females and seven different males were used during this experiment. The  
196 experiment aimed to make large-scale *in vitro* fertilisations using spz egg<sup>-1</sup> ratios from  
198 the previous experiment to fertilise the number of eggs (> 100,000 eggs) that would be  
200 required in a commercial fish farming scenario. When an ovulated female was  
202 encountered, sperm was collected and checked to find a male with  $\geq 150$   $\mu$ L of motile  
204 sperm. The sperm was immediately diluted 1:4 in modified Leibovitz and a sample of 50  
206  $\mu$ L of diluted sperm was taken to determine spz concentration and percentage motility  
(CASA). All the eggs were stripped from the female into a clean, dry 1 L jug and the  
208 volume of eggs was measured with an accuracy of 10 mL. Three samples of 0.5 mL of  
eggs were taken and counted. The remaining sperm obtained from the male was added to  
the eggs followed by a volume of seawater that was equal to the volume of eggs. The  
eggs, sperm and seawater were gently swirled to mix the contents. After 2-3 minutes the  
jug was topped up to 1 L with seawater. The eggs were then divided into two or three  
parts and each part was placed in a 30 L incubator with the same conditions as the  
broodstock holding tanks. The number of eggs in each incubator was estimated by mixing  
the incubator homogeneously and taking three 100 mL samples and counting the eggs in  
each sample. The eggs were left two days to hatch and the number of hatched larvae in  
each incubator was estimated as above for the eggs. The hatch rate was calculated from  
the number of eggs stocked and number of larvae hatched and the mean was calculated  
for the replica incubators used for each female - male pair.

#### 2.5 Egg viability experiment

214 Three different females and three different males were used during this experiment. When  
216 an ovulated female was encountered, males were checked to find a male with  $\geq 100$   $\mu$ L  
of motile sperm. The sperm was immediately diluted 1:4 in Leibovitz. All the eggs were  
218 stripped from the female into a clean, dry 1 L jug. The eggs were covered and stored at  
room temperature inside a building (out of sun light). As soon as possible after the  
220 gametes were stripped the first fertilisation was completed as previously described. The  
time the eggs were stripped and the time the first fertilisation was made was recorded.  
222 Further fertilisations were completed at 30 to 60 minute intervals. Fertilisations were  
completed in duplicate or triplicate using 0.5 mL of eggs and 20  $\mu$ L of diluted sperm that  
224 ensured an excess of motile spz per egg. As described above, the beakers of fertilised  
eggs were transferred to a 16 °C incubator and after 24 hours the percentage of developing  
226 eggs was determined for each fertilisation.

## 2.6 Sperm collection experiment

228 Thirteen males were used for this experiment. Sperm from each male was collected as  
previously described, with the exception that the sperm was collected either into an empty  
230 clean syringe (100  $\mu$ L of sperm) or into a syringe that contained modified Leibovitz (to  
give a 1:4 dilution, 50  $\mu$ L of sperm collected into 200  $\mu$ L of Leibovitz). Both collection  
232 methods were used for each male and the sequence of collection was alternated. For seven  
animals sperm was first collected into a clean syringe and then into a syringe that  
234 contained modified Leibovitz and for six animals the reverse, first directly into modified  
Leibovitz and then a clean syringe. The 100  $\mu$ L of sperm collected into a clean syringe  
236 was immediately divided into 50  $\mu$ L that was diluted in 200  $\mu$ L of Leibovitz (1:4 dilution)  
and 50  $\mu$ L that was kept as undiluted sperm as a control. The time of collection and  
238 dilution after collection was recorded. The sperm motility parameters were analysed  
(CASA) for the samples collected by these three methods: collected directly into  
240 Leibovitz, collected before dilution in Leibovitz and undiluted sperm. Sperm motility  
parameters were analysed 30 s after activation for 2 s. The parameters were measured at  
242 the time of collection (0 h), six and 24 h after collection.

## 2.7 Data analysis and statistics

244 All means are with one standard deviation unless otherwise stated. For the spermatozoa  
egg<sup>-1</sup> ratio experiment, the percentage of viable eggs fertilised was calculated by dividing  
246 the actual fertilisation rate by the mean fertilisation rate when sperm was in excess. The  
number of motile sperm was calculated by multiplying the volume of diluted sperm added  
248 by the spermatozoa concentration and the percentage motility. To examine the effect that  
gamete quality amongst the five pairs of fish had on fertilization, a linear regression was  
250 applied to percentage of motile sperm (sperm quality) against number of sperm (motile  
and immotile) required per viable egg and to percentage of viable eggs (egg quality)  
252 against number of motile sperm required per egg. To describe the variation of percentage  
of viable eggs fertilised in relation to the number of motile spz per egg, a non-linear  
254 regression based on an equation for an exponential rise to a maximum with double, five  
parameters was applied to the data. For the egg viability experiment, the percentage of  
256 viable eggs fertilised was calculated as above. To describe the variation of percentage of  
viable eggs fertilised in relation to time the eggs were stored at room temperature a non-  
258 linear regression based on an equation for a four parameter logistic curve was applied to  
the data.

260 The data set for percentage motility from the sperm collection experiment was not  
normally distributed with a high percentage of zeros and skewed positively to a few  
262 higher values. The data set could not be transformed to normality. The data was analysed  
twice. In one analysis, the data from the time point zero was ranked and analysed with a  
264 two-way ANOVA with the independent variables order of collection (1<sup>st</sup> or 2<sup>nd</sup>) and  
collection treatment (collected directly into Leibovitz, diluted in Leibovitz and undiluted  
266 sperm). In a second analysis the data set was scored into samples with or without motility  
and a Chi squared analysis was made to compare expected proportions of samples with  
268 motility with actual proportions with motility between sperm collection treatments  
(collected directly into Leibovitz, diluted in Leibovitz and undiluted sperm) and time of  
270 storage (0 h, 6 h and 24 h). The Marascuillo procedure (Prins, 2012) was used to make a  
multiple comparison between proportions of individual treatments and time points. All  
272 the samples with motility were then separated (i.e. all the zeros were excluded) into a  
smaller data set that was transformed to normality with the Logit transformation. The  
274 transformed data was compared with a one way ANOVA followed by Holm-Sidak

276 pairwise multiple comparison to compare mean motility for each treatment at each time  
point. A  $P < 0.05$  was used to indicate significant differences. All statistical comparisons  
and regressions were made using Sigma Plot 12 (Systat Software, Inc., San Jose, CA  
278 95110, USA) except for the Marascuillo procedure that was completed with an Excel  
(Microsoft) worksheet written by the authors.

### 280 3.0 Results

A total of 46 males were checked to obtain 28 (60.9 %) males with the required sperm  
282 quantity and quality for the experiments. All males were only used once. A total of 20  
females were selected by ovarian swelling and oocyte diameter determined. Five females  
284 were rejected as the ovaries contained ovulated ova and two as the ovaries had solid cysts.  
A total of 13 females had oocytes  $\geq 600 \mu\text{m}$  and were induced with GnRH $\alpha$ . Five females  
286 were not used as four females did not ovulate and one female had low quality eggs (0%  
fertilisation). Eight (62%) females ovulated good quality eggs that were used in the  
288 different experiments. The eggs from some females were used for more than one  
experiment. The mean latency time from injection with GnRH $\alpha$  to the ovulation was  
290  $41:57 \pm 1:46$  h and mean fertilisation was  $82.6 \pm 9.2\%$ . The mean fecundity was  $130,789$   
 $\pm 36,723$  eggs fish $^{-1}$  or  $87,174 \pm 24,378$  egg kg $^{-1}$  of female body weight. The maximum  
292 time difference between stripping eggs and sperm was 30 minutes, therefore, either sperm  
or eggs were stored for 30 min or less before fertilisation experiments were initiated.

#### 294 3.1 Spermatozoa to egg ratio experiment

The percentage of viable eggs fertilised in relation to number of motile spz per egg  
296 showed a rapid increase from zero that was represented by a non-linear regression based  
on an equation for an exponential rise to a maximum with double, five parameters ( $R =$   
298  $0.93$ ,  $P < 0.0001$ ) (Fig. 1). The non-linear regression described that only 326 motile spz  
per egg fertilised  $79 \pm 15\%$  ( $\pm 95\%$  CI - confidence interval) of viable eggs, that 649  
300 motile sperm fertilised  $90 \pm 13\%$  ( $\pm 95\%$  CI) of viable eggs and 1617 motile spz fertilised  
 $99 \pm 12\%$  ( $\pm 95\%$  CI) of viable eggs.

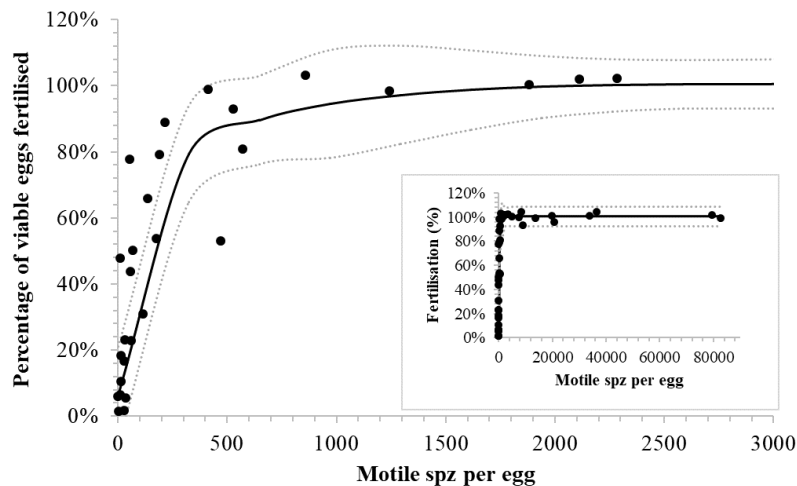

302 **Figure 1. The percentage of viable eggs fertilised in relation to the number of motile spermatozoa**  
304 **(spz) per viable egg for Senegalese sole (*Solea senegalensis*).** The insert figure shows the entire data set  
up to over 80,000 spz per egg and the large figure shows a close up of the data up to 3,000 motile spz per  
306 egg. The continuous line shows a non-linear regression based on an equation for an exponential rise to a  
maximum with double, five parameters ( $R = 0.93$ ,  $P < 0.0001$ ) that represents the variation in percentage  
308 of viable eggs fertilised in relation to number of motile sperm per egg. The dotted lines indicate 95%  
confidence intervals for the non-linear regression.

310 Amongst the five pairs, the percentage motility of the spz was correlated to the number  
of spz (motile and non-motile) required to fertilise a viable egg ( $R^2 = 0.83$ ,  $P = 0.021$ ).  
312 However, there was no correlation between percentage of viable eggs and number of  
motile sperm required to fertilise each egg ( $R^2 = 0.03$ ,  $P = 0.37$ ). Caution is required in  
314 the interpretation as  $n$  was low ( $n = 5$ ) and the statistical power (at  $\alpha = 0.05$ ) of the tests  
was 0.66 and 0.13, respectively for percentage motility and viable eggs.

### 316 3.2 Proof-of-concept experiment

The proof-of-concept large-scale *in vitro* fertilisations ( $n = 7$ ) gave a mean percentage  
318 hatch of  $70 \pm 14\%$  to produce a mean of  $131,540 \pm 34,448$  larvae per fertilisation (Table  
1). The sperm from a single selected cultured male with a volume of  $145 \pm 50 \mu\text{L}$  and  
320 total spz count of  $8 \pm 6.8 \times 10^8$  was sufficient to fertilise large numbers of eggs ( $190,512$   
 $\pm 38,471$ ) and produce large numbers of larvae ( $131,540 \pm 34,448$ ). The mean number of  
322 spz per egg used for the commercial fertilisations was  $2,981 \pm 2,932$  spz egg<sup>-1</sup> or  $592 \pm$   
 $611$  motile spz egg<sup>-1</sup>.

### 324 3.3 Egg viability experiment

The percentage of viable eggs fertilised decreased gradually from after being stripped  
326 (Fig. 2). The non-linear regression based on an equation for a four parameter logistic  
curve ( $R = 0.80$ ,  $P = 0.008$ ) represented the variation in percentage of viable eggs  
328 fertilised in relation to the time eggs from the three females were stored at room  
temperature. The non-linear regression indicated that after 30 min, the percentage  
330 fertilisation had decreased from 100% to  $81 \pm 26\%$  ( $\pm 95\%$  CI), after an hour to  $57 \pm 20\%$   
( $\pm 95\%$  CI) and after two hours  $32 \pm 19\%$  ( $\pm 95\%$  CI) fertilisation of viable eggs.

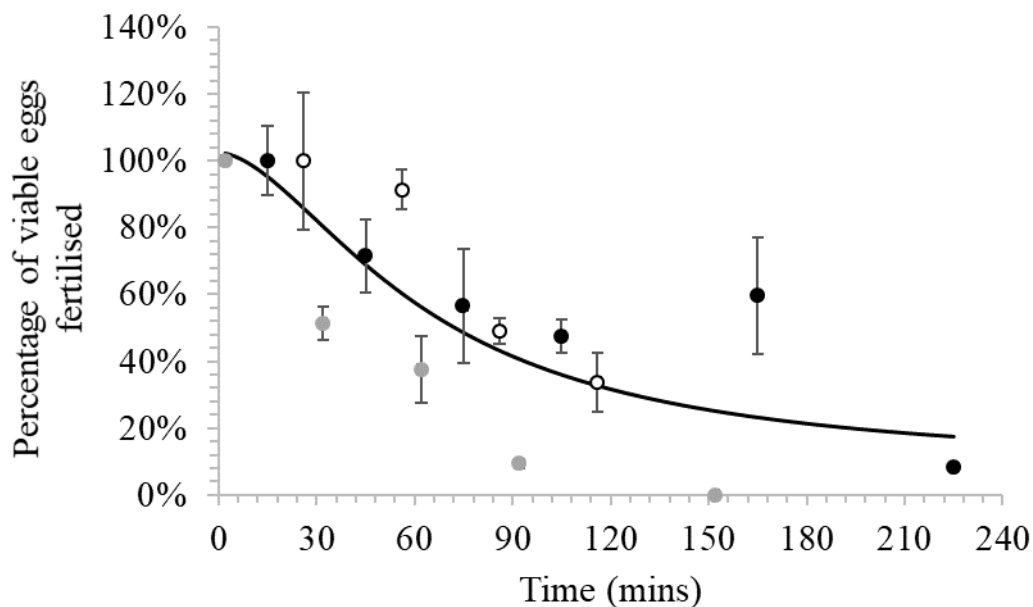

332 **Figure 2. The percentage of viable eggs fertilised in relation to time eggs were stored at room**  
334 **temperature for three Senegalese sole (*Solea senegalensis*) females.** Different dots represent different  
females. The line shows a non-linear regression based on an equation for a four parameter logistic curve ( $R$   
336  $= 0.80$ ,  $P = 0.008$ ) that represents the variation in percentage of viable eggs fertilised in relation to time the  
eggs from the three females were stored.



338 **Table 1. Data from seven commercial scale *in vitro* fertilisations made for Senegalese sole (*Solea senegalensis*).** Latency time from application of GnRH $\alpha$  (5  $\mu\text{g kg}^{-1}$ ) to  
 340 stripping of ovulated eggs, volume of eggs used, total number of eggs used, volume of sperm used (sperm from single male before dilution), total number of spermatozoa (spz) added, number of spz per egg added, percentage motility of spz, number of motile spz per egg, mean percentage hatch in incubators and total number of larvae produced.

| Female      | Latency time | Vol. eggs (mL) | Total n° eggs  | Vol. sperm ( $\mu\text{L}$ ) | Total n° Spz. $\times 10^8$ | N° spz. per egg | Percentage spz motility | Total n° motile spz. per egg | Percentage hatch $\pm$ SD | Total n° larvae |
|-------------|--------------|----------------|----------------|------------------------------|-----------------------------|-----------------|-------------------------|------------------------------|---------------------------|-----------------|
| 1           | 41:20        | 120            | 161,280        | 140                          | 14.0                        | 8,681           | 10.4                    | 905                          | 82 $\pm$ 16               | 132,415         |
| 2           | 43:15        | 150            | 252,450        | 140                          | 3.3                         | 129             | 21.9                    | 28                           | 79 $\pm$ 14               | 198,530         |
| 3           | 40:45        | 75             | 144,250        | 100                          | 6.9                         | 4,802           | 38.1                    | 1830                         | 78 $\pm$ 24               | 112,600         |
| 4           | 42:00        | 110            | 181,940        | 120                          | 1.5                         | 824             | 30.0                    | 247                          | 58 $\pm$ 10               | 104,625         |
| 5           | 39:30        | 100            | 198,467        | 160                          | 3.5                         | 1,747           | 22.2                    | 388                          | 77 $\pm$ 7                | 153,245         |
| 6           | 43:40        | 100            | 167,500        | 120                          | 4.9                         | 2,925           | 8.3                     | 242                          | 71 $\pm$ 11               | 117,500         |
| 7           | 44:40        | 150            | 227,700        | 120                          | 4.0                         | 1,757           | 28.8                    | 507                          | 44 $\pm$ 9                | 101,865         |
| <b>Mean</b> | <b>41:57</b> | <b>115</b>     | <b>190,512</b> | <b>145</b>                   | <b>8.0</b>                  | <b>2,981</b>    | <b>22.8</b>             | <b>592</b>                   | <b>70</b>                 | <b>131,540</b>  |
| $\pm$ SD    | 01:46        | 27.5           | 38,471         | 50                           | 6.8                         | 2,933           | 10.7                    | 611                          | 14                        | 34,448          |

### 342 3.4 Sperm extraction experiment

344 The order of collection of the sperm appeared to have a significant effect and the first part  
of the sperm collected had significantly ( $P = 0.04$ ) higher motility than the second part  
(Fig. 3). However, caution is required in the interpretation as there was considerable  
346 variation and the statistical power of the test was low (at  $\alpha = 0.05$ , power = 0.44). The  
percentage of samples that had motility decreased significantly ( $P < 0.001$ ) with time (Fig.  
348 4). At the time of collection ( $t = 0$ ) there were no differences in the percentage of samples  
with motility, but after six and 24 h of storage at  $4^{\circ}\text{C}$  the samples collected directly into  
350 modified Leibovitz had significantly ( $P < 0.05$ ) more samples with motility.

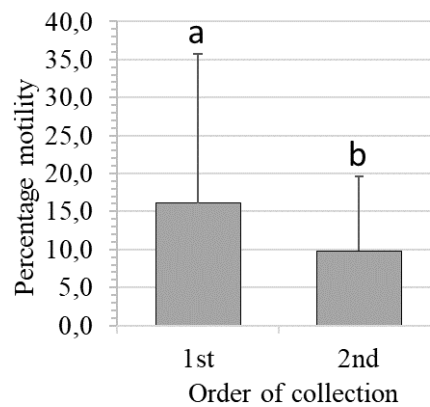

352 **Figure 3. Mean percentage motility ( $\pm 1$  standard deviation) of sperm samples collected first or**  
354 **second from each Senegalese sole (*Solea senegalensis*) male. Different letters indicate a significant**  
difference ( $P = 0.04$ ,  $\alpha = 0.05$ , power = 0.44).

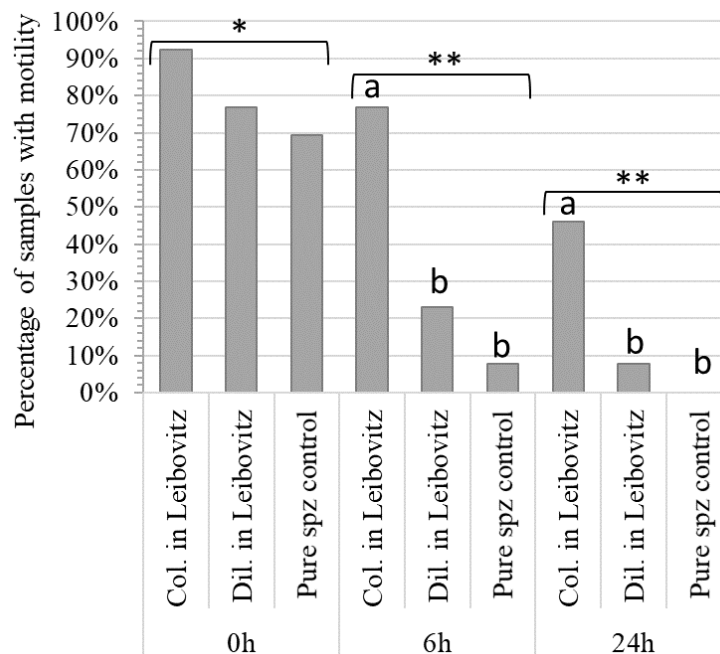

362 The percentage motility was significantly higher ( $P < 0.05$ ) in samples collected directly  
364 into modified Leibovitz at  $t = 0$  compared to other time points ( $t = 6$  and  $24$ ) and other  
366 collection methods, diluted in modified Leibovitz and undiluted (control), at all time  
368 points ( $t = 0, 6$  and  $24$ ) (Fig. 5). The motility of samples collected directly into Leibovitz  
and stored for six hours was significantly ( $P < 0.05$ ) higher than undiluted sperm samples  
at collection ( $t = 0$ ). The time difference in mixing sperm with Leibovitz was  $4 \pm 2$   
minutes, between samples collected directly into Leibovitz and the sperm diluted in  
Leibovitz after collection.

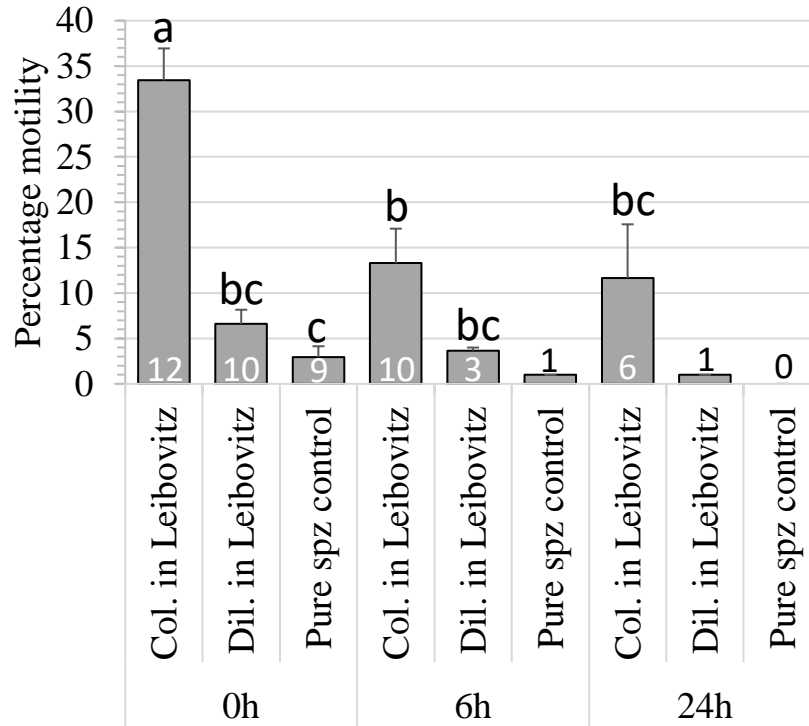

370 **Figure 5. Mean percentage motility ( $\pm 1$  standard error of the mean) of sperm samples collected from**  
372 **Senegalese sole (*Solea senegalensis*) using three collection methods, collected directly into modified**  
374 **Leibovitz (Col. in Leibovitz), diluted in modified Leibovitz (Dil. in Leibovitz) after collection and**  
376 **undiluted sperm (control). The motility of samples was tested at different time points 0 h after collection**  
and after six (6 h) and 24 hours (24 h) of storage at 4°C. Different letters indicate a significant difference  
( $P < 0.05$ ) amongst collection methods and time points. The “n” of each mean is at the bottom of each  
column. Means with less than  $n = 3$  were not included in the statistical test.

## 378 4.0 Discussion

### 380 4.1 Low spermatozoa to egg ratio in Senegalese sole

380 The present study demonstrated that low numbers of spermatozoa  $\text{egg}^{-1}$  ensured high  
382 levels of fertilisation in Senegalese sole. An exponential rise to a maximum ( $R = 0.93$ ,  $P$   
384  $< 0.0001$ ) described the number of motile spz required to fertilise a viable egg, the  
386 relationship rose steeply from 0 to 90% fertilisation and from approximately 500 motile  
388 spz plateaued at 90 to 100 % fertilisation. A total of 1617 motile spz per egg were  
sufficient to fertilise  $99 \pm 12\%$  ( $\pm 95\%$  CI) of viable eggs. A low mean spz  $\text{egg}^{-1}$  ratio also  
gave high rates of hatching in the proof-of-concept trials with large-scale *in vitro*  
fertilisations. A mean of  $190,512 \pm 38,471$  eggs from a single female were fertilised with  
a mean volume of sperm of  $145 \pm 50 \mu\text{L}$  from a single male. This volume of sperm

provided a mean of  $592 \pm 611$  motile spz per viable egg, which was sufficient to achieve  
390  $70 \pm 14$  % hatch and produce  $131,540 \pm 34,448$  larvae per *in vitro* fertilisation. The spz  
egg<sup>-1</sup> ratios for Senegalese sole were at the lower end of ratios required for fish. Studies  
392 have shown that different fish species require a wide range of spz egg<sup>-1</sup> ratios to achieve  
high rates of fertilisation (Beirão et al., 2019). These ratios ranged from 3000 spz egg<sup>-1</sup>  
394 for turbot (Chereguini et al., 1999) to  $1 \times 10^5$  spz egg<sup>-1</sup> for Atlantic cod (*Gadus morhua*)  
(Butts et al., 2009). Large-scale *in vitro* fertilisations protocols used in a hatchery  
396 generally refer to the volume of sperm needed to fertilise eggs, for example in rainbow  
trout 1 mL of sperm was recommended for 10,000 eggs (Bromage, 1992) and for Atlantic  
398 halibut (*Hippoglossus hippoglossus*) 1 mL of sperm for 1 L of eggs (Brown, 2010). For  
Senegalese sole, the present study has shown that a conservative estimation for hatcheries  
400 based on the experiments and the 95% standard deviations, would be 200  $\mu$ L of sperm ( $\approx$   
 $2.5 \times 10^8$  motile spz) to fertilise 100 mL of eggs ( $\approx$  150,000 eggs).

#### 402 **4.2 Improved *in vitro* protocol**

An aspect that complicates *in vitro* fertilisation protocols is ensuring good gamete quality  
404 for fertilisation. Generally, the sperm is obtained first and stored until eggs are obtained  
(Mylonas et al., 2017). Considering that Senegalese sole sperm has poor quality  
406 (González-López et al., 2020) and eggs have a short period of viability (Rasines et al.,  
2013, 2012), the storage of eggs and collection methods of sperm were examined in the  
408 present study to improve the *in vitro* fertilisation protocol. In addition, the present study  
ensured sperm or eggs were not stored for longer than 30 minutes before fertilisation to  
410 limit the effect of gamete quality deterioration. This proved to be necessary as the decline  
in quality of stripped Senegalese sole eggs stored at room temperature was gradual and  
412 continuous. Egg quality appeared to decline during the first 30 min of storage with no  
plateau period of good egg quality, which indicated the sooner eggs were fertilised after  
414 stripping the higher the viability of the eggs. This decline in egg quality after ovulation  
and stripping has been described in a wide range of species as the overripening process,  
416 where eggs age and in association with morphological and biochemical changes lose  
viability and fertilisation rates decline (Mañanós et al., 2008; Ramos-Júdez et al., 2019;  
418 Samarin et al., 2011). A rapid decline in egg quality has been observed in other species,  
but the decline was initiated after a period of good egg quality of 1 h in curimata  
420 (*Prochilodus marggravii*) (Rizzo et al., 2003) and 50 min in meagre (*Argyrosomus*  
*regius*) (Ramos-Júdez et al., 2019). There is considerable variation across species and  
422 some species have very different egg storage capacities, for example eggs from a  
Cyprinidae species kutum (*Rutilus frisii*) (Samarin et al., 2011) maintained good egg  
424 quality during eight hours of storage and salmonid eggs can be stored successfully for 4-  
5 days (Bromage, 1992).

426 To improve sperm quality different methods of sperm collection were compared. The  
collection of sperm directly into modified Leibovitz significantly increased motility at the  
428 time of collection and the storage capacity in terms of motility and number of samples  
with motility. Senegalese sole sperm is difficult or impossible to collect without urine  
430 contamination (González-López et al., 2020). The urine has negative effects on the sperm  
quality, which as in other species appeared to change osmolality and pH, which  
432 prematurely activated spz (Cejko et al., 2010; González-López et al., 2020; Linhart et al.,  
2003; Perchec Poupard et al., 1998). The collection into modified Leibovitz mitigated the  
434 negative effect of urine contamination to improve the sperm quality (González-López et  
al., 2020). Other studies on species where urine contamination was difficult to avoid have  
436 focused on improved collection methods that reduce urine contamination with the use of

438 catheters that were inserted into the sperm duct (Babiak et al., 2006; Sarosiek et al., 2016)  
439 or used a collecting pipette in combination with vacuum aspiration (Gallego et al., 2013a).  
440 The very small volumes and small diameter of the urogenital pore in Senegalese sole  
441 make these kinds of approaches difficult or impossible. Small volumes of contaminated  
442 sperm obtained from some species of birds were collected directly into syringes with  
443 extender to maintain sperm quality (Personal communication, Dr. Ignacio Giménez  
444 Nebot, Rara Avis Biotec S.L., Valencia, Spain). Therefore, in the present study, this  
445 approach was taken to reduce the time that spz were in contact with urine contamination  
446 before dilution in the Leibovitz extender. A significant improvement in sperm quality was  
447 obtained by collecting the sperm directly into a syringe containing modified Leibovitz,  
448 which reduced by  $4 \pm 2$  minutes the time before sperm was diluted with Leibovitz.

### 448 **4.3 Sustainable Senegalese sole aquaculture**

449 The success of massive *in vitro* fertilisations, combined with indications of egg viability  
450 during storage and improved methods for collecting and managing sperm, provided a  
451 protocol that can be used on an industrial scale to obtain eggs from cultured breeders for  
452 hatchery production. At present, the Senegalese sole aquaculture industry relies on  
453 obtaining eggs from wild adult breeders captured in the commercial fishery and there is  
454 no sustainable fishery for Senegalese sole (<https://fisheries.msc.org>). Therefore,  
455 obtaining viable eggs from cultured breeders has been a bottleneck that makes the  
456 industry unsustainable and unable to implement breeding programs. Breeding programs  
457 are an essential part of an aquaculture business plan that enable companies to improve  
458 growth and product quality. However, ideally, reproduction must be controlled to enable  
459 the selection and production of viable gametes from any animal that has the desired  
460 production traits. In the present study, 61% of the males checked for sperm had the  
461 required quantity and quality needed for the experiments and *in vitro* fertilisations. This  
462 availability of males, has already be improved as therapies with recombinant  
463 gonadotropins exist that both increase sperm production and quality (Chauvigné et al.,  
464 2018, 2017). These recombinant gonadotropin therapies, significantly increased sperm  
465 production by up to seven times and significantly increased the sperm quality parameters,  
466 percentage motility, progressivity and velocity of spz.

467 In the present study, females were initially selected by ovarian swelling and it is unclear  
468 what percentage of females would be available for selection over a reproductive season.  
469 Of the females that were GnRHa-induced, 62% ovulated good quality eggs. Therefore,  
470 studies are needed to identify the number of females available for GnRHa induction and  
471 to improve the success rate of GnRHa inductions. The present study used a GnRHa dose  
472 of  $5 \mu\text{g kg}^{-1}$  to induce the ovulation of eggs compared to  $25 \mu\text{g kg}^{-1}$  used by Rasines et al.  
473 (2013, 2012). These studies had similar holding conditions and temperature ( $16^\circ\text{C}$ ) and  
474 obtained very similar timing of ovulation with means close to 42 h (range of 39 to 44 h).  
475 Egg quality appeared to be higher in the present study, but differences in methods and  
476 particular sperm storage and usage make comparisons inappropriate. Different doses of  
477 GnRHa have been compared to induce spontaneous liberations of eggs in Senegalese sole.  
478 Agulleiro et al. (2006), tested the injection of GnRHa doses of one, five and  $30 \mu\text{g kg}^{-1}$ .  
479 The dose of  $5 \mu\text{g kg}^{-1}$  produced the most eggs and the dose of  $30 \mu\text{g kg}^{-1}$  produced no  
480 liberations of eggs. Guzman et al. (2009) compared injections of 5 and  $25 \mu\text{g kg}^{-1}$  of  
481 GnRHa, but found no differences in number of eggs released between GnRHa injected  
482 and untreated control fish. However, the number of oocytes advancing to hydration in the  
483 females treated with  $5 \mu\text{g kg}^{-1}$  appeared to be higher than in females treated with  $25 \mu\text{g}$   
484  $\text{kg}^{-1}$  and controls. The present study, combined with studies on GnRHa induced

spontaneous liberations of eggs, would indicate that the lower dose of  $5 \mu\text{g kg}^{-1}$  of GnRHa provided similar ovulation timing and egg quality as  $25 \mu\text{g kg}^{-1}$  and perhaps suggest that better results may be obtained with lower doses.

#### 4.4 Gamete quality and fertilisation

Logically, the spz egg<sup>-1</sup> ratio required is related to the success of individual sperm to fertilise an egg. The success of spz will depend on factors of the fertilisation environment and gamete quality / characteristics that hinder or aid the spz to reach the micropyle of the egg. The environment used for *in vitro* fertilisation has been shown to affect the spz egg<sup>-1</sup> ratio. For example, the volume or space provided for fertilisation affected the spz egg<sup>-1</sup> ratio, as larger volumes increased the space to be travelled to fertilise the egg and increased the number of spz required (Bombardelli et al., 2013; Chereguini et al., 1999; Sanches et al., 2016). Therefore, variation in the fertilisation environment complicates the comparison of different studies within and amongst species. However, as in the present study the fertilisation environment can be standardised between tests and replicated to ensure results can be compared.

Gamete characteristics and / or quality vary amongst species and individuals. Variations in gamete quality have been shown to affect the spz egg<sup>-1</sup> ratio. Obviously, percentage sperm motility affects the ratio (Gallego et al., 2013b; Moccia and Munkittrick, 1987), but velocity has also been shown to affect the ratio in walleye (*Sander vitreus*) (Casselmann et al., 2006) and pufferfish (*Takifugu niphobles*) (Gallego et al., 2013b). Sperm with higher percentage motility (Gallego et al., 2013b; Moccia and Munkittrick, 1987) and spermatozoa with higher mean swimming speeds had lower spz egg<sup>-1</sup> ratios to fertilise a high percentage of eggs (Casselmann et al., 2006; Gallego et al., 2013b). In the present study, sperm percentage motility was related positively with spz egg<sup>-1</sup> ratio ( $R^2 = 0.83$ ,  $P = 0.021$ ). Senegalese sole sperm has variable and generally poor quality with low percentage motility (González-López et al., 2020). In the present study as in other studies (Ramos-Júdez et al., 2019), the effect that percentage motility has on the spz egg<sup>-1</sup> ratio was removed by examining the relationship between the number of motile sperm and eggs fertilised. Many studies simply express total number of sperm (including immotile sperm) in the spz egg<sup>-1</sup> ratio, however, this is inaccurate and should be stated with the percentage motility of the sperm used. Although the practice of using total spz is accepted in the literature it should only be applied to species that have little variation in motility and preferably high levels (close to 100%) of motility amongst individuals.

In the present study, the quality of eggs did not appear to be related to the spz egg<sup>-1</sup> ratio. However, the low variation in egg quality ( $82.6 \pm 9.2\%$ ) and  $n$  ( $n=5$ ) may have reduced the possibility to determine a relationship. Previous studies are contradictory indicating that eggs with higher quality required more (Ramos-Júdez et al., 2019) and less (Bombardelli et al., 2013) spz than low quality eggs. It would appear probable that both the quality and the characteristics of the unfertilised egg are implicated in the fertilisation success. Good quality eggs would have more eggs to be fertilised and low quality eggs would have an environment with more space to encounter viable eggs amongst the inviable eggs. In addition, fish eggs of some species have been shown to have no mechanisms to attract spz whilst other species eggs have chemical and physical properties that guide the spz to the micropyle (Yanagimachi et al., 2017). The ability to attract spz to the eggs would in theory reduce the spz egg<sup>-1</sup> ratio. These observations would suggest number of motile spz per viable egg should be used to ensure egg viability does not affect the spz egg<sup>-1</sup> ratio. However, further work is required to determine the effect of egg quality on the spz egg<sup>-1</sup> ratio.

#### 4.5 Why do Senegalese sole have a low spz egg<sup>-1</sup> ratio?

534 Senegalese sole spawn as a female and male pair with no involvement of other individuals  
(Carazo et al., 2016) and spawning pairs show a degree fidelity during and between  
536 spawning seasons (Fatsini et al., 2020; Martín et al., 2014). Therefore, Senegalese sole  
fertilisation does not involve sperm competition as all the sperm originates from a single  
538 male and does not compete with sperm from other males. In addition, the two sexes swim  
in synchrony with the genital pores held close together (Carazo et al., 2016). The male  
540 urogenital duct is slightly raised and the female oviduct forms a kind of well when eggs  
are being stripped (personal observations), which together with the closeness of the fish  
542 during gamete liberation (Carazo et al., 2016) suggest that the male and female place the  
spz next to the eggs in very close proximity. Other studies have demonstrated that these  
544 behavioural and reproductive strategies are related to low spz egg<sup>-1</sup> ratios or low sperm  
production. Reducing the space of the fertilisation environment has been shown to reduce  
546 the spz egg ratios<sup>-1</sup> required (Bombardelli et al., 2013). Different species have very varied  
strategies and behaviours that will alter the space of the fertilisation environment, which  
548 can range from mass spawning in aggregations in open water (Domeier and Colin, 1997;  
Ibarra-Zatarain and Duncan, 2015) to spawning between two fish in an enclosed space or  
550 in very close proximity (Carazo et al., 2016; Tatarenkov et al., 2006). The spawning  
behaviour and number of individuals involved will influence the degree of sperm  
552 competition that gametes must negotiate to achieve fertilisation. Sperm competition has  
been shown to influence fertilisation success and the number of spz that a species  
554 produces (Parker and Pizzari, 2010; Stockley et al., 1997). Monogamy, and the absence  
of sperm competition was demonstrated to reduce testes size across different taxa and  
556 monogamous fish species defined as spawning in a pair had significantly smaller testes  
compared to polyandrous species (group spawning of males with a female) (Baker et al.,  
558 2020). Therefore, as has been suggested for fresh water fish (Kholodnyy et al., 2020),  
reproductive strategies and behaviour appear to be linked to gamete requirements to  
560 achieve high rates of fertilisation. Consequentially, the reproductive strategy and  
behaviour of Senegalese sole support the described low spz production (García-López et  
562 al., 2005; González-López et al., 2020) as well as the low spz egg<sup>-1</sup> ratio for fertilisation  
(present study). It can be hypothesised that spz egg<sup>-1</sup> ratio is related to reproductive  
564 strategies and sperm production, however, more work is required across a wide range of  
species to determine the existence of a relationship.

#### 566 4.6 Conclusion

In conclusion, Senegalese sole require a low spz egg<sup>-1</sup> ratio to achieve high percentages  
568 of fertilisation both on an experimental scale and in proof-of-concept large-scale *in vitro*  
fertilisations. The low spz egg<sup>-1</sup> ratio required to fertilise all viable eggs was consistent  
570 with the reproductive behaviour and strategies of the species. The protocol (200 µL of  
sperm per 100 mL of eggs) described in the present study will enable the Senegalese sole  
572 aquaculture industry to operate sustainably and establish breeding programs.

## 574 5. Acknowledgements

576 The authors would like to thank Josep Lluís Celades and the IRTA staff for technical  
577 assistance. Special thanks are also given for the participation and great enthusiasm to  
578 complete work to a high standard shown by Mario Villalta Vega and Alex Rullo Reverté,  
579 two work experience students from the IES Alfacs Escola d'Aqüicultura  
580 (<http://aquicultura.insalfacs.cat/>). This study has been supported with funding from the  
581 Spanish National Institute for Agronomic Research (Instituto Nacional de Investigación  
582 y Tecnología Agraria y Alimentación - INIA)-European Fund for Economic and Regional  
583 Development (FEDER) (RTA2014-0048) coordinated by Neil Duncan. The study was  
584 also supported and driven by discussions in the project 038433\_REARLING, funded by  
585 Portugal and the European Union through FEDER/ERDF, NORTE 2020, in the  
586 framework of Portugal 2020, coordinated by Isidro Blanquet (Sea8 Group, Póvoa de  
587 Varzim, Portugal) and in collaboration with Joan Cerdà (IRTA) and Ignacio Giménez,  
588 (Rara Avis Biotec S.L., Valencia, Spain). In particular special thanks are given to Ignacio  
589 Giménez who refused an authorship after selflessly giving his advice to help improve  
590 sperm collection and storage. Participation by Wendy González-López was funded by a  
591 PhD grant from the National Board of Science and Technology (CONACYT, Mexico)  
592 and Sandra Ramos-Júdez by a PhD grant from AGAUR (Government of Catalonia) co-  
financed by the European Social Fund.

## 6. References

- 594 Agulleiro, M.J., Anguis, V., Cañavate, J.P., Martínez-Rodríguez, G., Mylonas, C.C., Cerdà, J., 2006.  
595 Induction of spawning of captive-reared Senegal sole (*Solea senegalensis*) using  
596 different administration methods for gonadotropin-releasing hormone agonist.  
*Aquaculture* 257, 511–524. <https://doi.org/10.1016/j.aquaculture.2006.02.001>
- 598 Anguis, V., Cañavate, J.P., 2005. Spawning of captive Senegal sole (*Solea senegalensis*) under a  
600 naturally fluctuating temperature regime. *Aquaculture* 243, 133–145.  
<https://doi.org/10.1016/j.aquaculture.2004.09.026>
- 602 APROMAR, 2019. La acuicultura en España 2019, Asociación Empresarial de Acuicultura de  
España (APROMAR). APROMAR. <http://www.apromar.es/content/informes-anales>  
Accessed 17/08/2020
- 604 Babiak, I., Ottesen, O., Rudolfson, G., Johnsen, S., 2006. Chilled storage of semen from Atlantic  
605 halibut, *Hippoglossus hippoglossus* L. *Theriogenology* 66, 2025–2035.  
<https://doi.org/10.1016/j.theriogenology.2006.06.003>
- 606 Baker, J., Humphries, S., Ferguson-Gow, H., Meade, A., Venditti, C., 2020. Rapid decreases in  
608 relative testes mass among monogamous birds but not in other vertebrates. *Ecol. Lett.*  
23, 283–292. <https://doi.org/10.1111/ele.13431>
- 610 Beirão, J., Boulais, M., Gallego, V., O'Brien, J.K., Peixoto, S., Robeck, T.R., Cabrita, E., 2019. Sperm  
612 handling in aquatic animals for artificial reproduction. *Theriogenology* 133, 161–178.  
<https://doi.org/10.1016/j.theriogenology.2019.05.004>
- 614 Beirão, J., Soares, F., Herráez, M.P., Dinis, M.T., Cabrita, E., 2011. Changes in *Solea senegalensis*  
sperm quality throughout the year. *Anim. Reprod. Sci.* 126, 122–129.  
<https://doi.org/10.1016/j.anireprosci.2011.04.009>
- 616 Beirão, J., Soares, F., Herráez, M.P., Dinis, M.T., Cabrita, E., 2009. Sperm quality evaluation in  
618 *Solea senegalensis* during the reproductive season at cellular level. *Theriogenology* 72,  
1251–1261. <https://doi.org/10.1016/j.theriogenology.2009.07.021>
- 620 Bombardelli, R.A., Sanches, E.A., Baggio, D.M., Sykora, R.M., Souza, B.E. de, Tessaro, L., Piana,  
P.A., 2013. Effects of the spermatozoa: oocyte ratio, water volume and water



- temperature on artificial fertilization and sperm activation of cascudo-preto. Rev. Bras. Zootec. 42, 1–6. <https://doi.org/10.1590/S1516-35982013000100001>
- 622 Bromage, N., 1992. Propagation and stock improvement, in: Bromage, N., Shepherd, J. (Eds.),  
624 Intensive Fish Farming. Blackwell Science, Oxford, UK, pp. 103–153.
- Brown, N., 2010. Halibut aquaculture in North America, in: Daniels, H., Watanabe, W. (Eds.),  
626 Practical Flatfish Culture and Stock Enhancement. Blackwell Publishing, Ames, Iowa, USA.
- 628 Butts, I., Roustaian, P., Litvak, M., 2012. Fertilization strategies for winter flounder: effects of  
spermatozoa density and the duration of gamete receptivity. Aquat. Biol. 16, 115–124.  
630 <https://doi.org/10.3354/ab00439>
- Butts, I.A.E., Trippel, E.A., Litvak, M.K., 2009. The effect of sperm to egg ratio and gamete contact  
632 time on fertilization success in Atlantic cod *Gadus morhua* L. Aquaculture 286, 89–94.  
<https://doi.org/10.1016/j.aquaculture.2008.09.005>
- 634 Cabrita, E., Soares, F., Beirão, J., García-López, A., Martínez-Rodríguez, G., Dinis, M.T., 2011.  
Endocrine and milt response of Senegalese sole, *Solea senegalensis*, males maintained  
636 in captivity. Theriogenology 75, 1–9.  
<https://doi.org/10.1016/j.theriogenology.2010.07.003>
- 638 Cabrita, E., Soares, F., Dinis, M.T., 2006. Characterization of Senegalese sole, *Solea senegalensis*,  
male broodstock in terms of sperm production and quality. Aquaculture 261, 967–975.  
640 <https://doi.org/10.1016/j.aquaculture.2006.08.020>
- Carazo, I., Chereguini, O., Martín, I., Huntingford, F., Duncan, N., 2016. Reproductive ethogram  
642 and mate selection in captive wild Senegalese sole (*Solea senegalensis*). Span. J. Agric.  
Res. 14, e0401. <https://doi.org/10.5424/sjar/2016144-9108>
- 644 Casselman, S.J., Schulte-Hostedde, A.I., Montgomerie, R., 2006. Sperm quality influences male  
fertilization success in walleye (*Sander vitreus*). Can. J. Fish. Aquat. Sci. 63, 2119–2125.  
646 <https://doi.org/10.1139/f06-108>
- Cejko, B.I., Źarski, D., Targońska, K., Krejszef, S., Kucharczyk, D., Glogowski, J., 2010. Osmolality  
648 of Seminal Plasma as an Indicator of Milt Contamination with Urine Based on the  
Example of the Tench *Tinca tinca* (L.). Pol. J. Nat. Sci. 25, 287–298.  
650 <https://doi.org/10.2478/v10020-010-0026-6>
- Chauvigné, F., González, W., Ramos, S., Ducat, C., Duncan, N., Giménez, I., Cerdà, J., 2018.  
652 Seasonal-and dose-dependent effects of recombinant gonadotropins on sperm  
production and quality in the flatfish *Solea senegalensis*. Comp. Biochem. Physiol. A.  
654 Mol. Integr. Physiol. 225, 59–64. <https://doi.org/10.1016/j.cbpa.2018.06.022>
- Chauvigné, F., Ollé, J., González, W., Duncan, N., Giménez, I., Cerdà, J., 2017. Toward developing  
656 recombinant gonadotropin-based hormone therapies for increasing fertility in the  
flatfish Senegalese sole. PLOS ONE 12, e0174387.  
658 <https://doi.org/10.1371/journal.pone.0174387>
- Chereguini, O., de la Banda, I.G., Rasines, I., Fernandez, A., 1999. Artificial fertilization in turbot,  
660 *Scophthalmus maximus* (L.): different methods and determination of the optimal sperm-  
egg ratio. Aquac. Res. 30, 319–324. <https://doi.org/10.1046/j.1365-2109.1999.00326.x>
- 662 Domeier, M.L., Colin, P.L., 1997. Tropical reef fish spawning aggregations: defined and reviewed.  
Bull. Mar. Sci. 60, 698–726.
- 664 Duncan, N., Carazo, I., Chereguini, O., Mañanós, E., 2019. Mating Behaviour, in: Munoz-Cueto,  
J., Mañanós-Sánchez, E., Sánchez-Vázquez, J. (Eds.), Biology of Sole. CRC Press, Boca  
666 Raton.
- Fatsini, E., Carazo, I., Chauvigné, F., Manchado, M., Cerdà, J., Hubbard, P.C., Duncan, N.J., 2017.  
668 Olfactory sensitivity of the marine flatfish *Solea senegalensis* to conspecific body fluids.  
J. Exp. Biol. 220, 2057–2065. <https://doi.org/10.1242/jeb.150318>
- 670 Fatsini, E., González, W., Ibarra-Zatarain, Z., Napuchi, J., Duncan, N.J., 2020. The presence of wild  
Senegalese sole breeders improves courtship and reproductive success in cultured

- 672 conspecifics. Aquaculture 519, 734922.  
<https://doi.org/10.1016/j.aquaculture.2020.734922>
- 674 Gallego, V., Carneiro, P.C.F., Mazzeo, I., Vílchez, M.C., Peñaranda, D.S., Soler, C., Pérez, L.,  
Asturiano, J.F., 2013a. Standardization of European eel (*Anguilla anguilla*) sperm motility  
676 evaluation by CASA software. Theriogenology 79, 1034–1040.  
<https://doi.org/10.1016/j.theriogenology.2013.01.019>
- 678 Gallego, V., Pérez, L., Asturiano, J.F., Yoshida, M., 2013b. Relationship between spermatozoa  
motility parameters, sperm/egg ratio, and fertilization and hatching rates in pufferfish  
680 (*Takifugu niphobles*). Aquaculture 416–417, 238–243.  
<https://doi.org/10.1016/j.aquaculture.2013.08.035>
- 682 García-López, Á., Martínez-Rodríguez, G., Sarasquete, C., 2005. Male reproductive system in  
Senegalese sole *Solea senegalensis* (Kaup): Anatomy, histology and histochemistry.  
684 *Histol. Histopathol.* 20, 1179–1189. <https://doi.org/10.14670/HH-20.1179>
- Gibson, R.N., Stoner, A.W., Ryer, C.H., 2014. The behaviour of flatfishes, in: Gibson, R.N., Nash,  
686 R.D.M., Geffen, A.J., van der Veer, H.W. (Eds.), *Flatfishes: Biology and Exploitation*.
- González-López, W.Á., Ramos-Júdez, S., Giménez, I., Duncan, N.J., 2020. Sperm contamination  
688 by urine in Senegalese sole (*Solea senegalensis*) and the use of extender solutions for  
short-term chilled storage. Aquaculture 516, 734649.  
690 <https://doi.org/10.1016/j.aquaculture.2019.734649>
- Guzmán, J.M., Cal, R., García-López, Á., Chereguini, O., Kight, K., Olmedo, M., Sarasquete, C.,  
692 Mylonas, C.C., Peleteiro, J.B., Zohar, Y., Mañanós, E.L., 2011. Effects of in vivo treatment  
with the dopamine antagonist pimozide and gonadotropin-releasing hormone agonist  
694 (GnRH<sub>a</sub>) on the reproductive axis of Senegalese sole (*Solea senegalensis*). *Comp.*  
*Biochem. Physiol. A. Mol. Integr. Physiol.* 158, 235–245.  
696 <https://doi.org/10.1016/j.cbpa.2010.11.016>
- Guzmán, J.M., Norberg, B., Ramos, J., Mylonas, C.C., Mañanós, E.L., 2008. Vitellogenin, steroid  
698 plasma levels and spawning performance of cultured female Senegalese sole (*Solea*  
*senegalensis*). *Gen. Comp. Endocrinol.* 156, 285–297.  
700 <https://doi.org/10.1016/j.ygcen.2008.02.002>
- Guzmán, J.M., Ramos, J., Mylonas, C.C., Mañanós, E.L., 2009. Spawning performance and plasma  
702 levels of GnRH<sub>a</sub> and sex steroids in cultured female Senegalese sole (*Solea senegalensis*)  
treated with different GnRH<sub>a</sub>-delivery systems. Aquaculture 291, 200–209.  
704 <https://doi.org/10.1016/j.aquaculture.2009.03.024>
- Ibarra-Zatarain, Z., Duncan, N., 2015. Mating behaviour and gamete release in gilthead  
706 seabream (*Sparus aurata*, Linnaeus 1758) held in captivity. *Span. J. Agric. Res.* 13, e0401.  
<https://doi.org/10.5424/sjar/2015131-6750>
- 708 Kholodnyy, V., Gadêlha, H., Cosson, J., Boryshpolets, S., 2020. How do freshwater fish sperm find  
the egg? The physicochemical factors guiding the gamete encounters of externally  
710 fertilizing freshwater fish. *Rev. Aquac.* 12, 1165–1192.  
<https://doi.org/10.1111/raq.12378>
- 712 Linhart, O., Rodina, M., Bastl, J., Cosson, J., 2003. Urinary bladder, ionic composition of seminal  
fluid and urine with characterization of sperm motility in tench (*Tinca tinca* L.). *J. Appl.*  
714 *Ichthyol.* 19, 177–181. <https://doi.org/10.1046/j.1439-0426.2003.00470.x>
- Liu, Xin-fu, Liu, Xue-zhou, Lian, J., Wang, Y., Zhang, F., Yu, H., Ma, A., Liu, S., Zhai, J., 2008. Large  
716 scale artificial reproduction and rearing of Senegal sole, *Solea senegalensis* Kaup. *Mar.*  
*Fish. Res.* 29, 10–16.
- 718 Mañanós, E., Duncan, N., Mylonas, C., 2008. Reproduction and Control of Ovulation,  
Spermiation and Spawning in Cultured Fish, in: Cabrita, E., Robles, V., Herráez, P. (Eds.),  
720 *Methods in Reproductive Aquaculture, Marine Biology*. CRC Press, pp. 3–80.  
<https://doi.org/10.1201/9780849380549.sec1>
- 722 Marrero-Alemán, C., González-López, W., Ramos-Júdez, S., Navarro, I., Duncan, N., 2019.  
Artificial fertilisation in Senegalese sole (*Solea senegalensis*): induction with GnRH<sub>a</sub> and

- determination of egg quality., in: Aquaculture Europe 19, Abstracts. Presented at the Aquaculture Europe 19, European Aquaculture Society, Berlin, Germany.
- 726 Martín, I., Carazo, I., Rasines, I., Rodríguez, C., Fernández, R., Martínez, P., Norambuena, F.,  
728 Chereguini, O., Duncan, N., 2020. Reproductive performance of captive Senegalese sole,  
730 *Solea senegalensis*, according to the origin (wild or cultured) and gender. *Span. J. Agric.*  
732 *Res.* 17, e0608. <https://doi.org/10.5424/sjar/2019174-14953>
- 730 Martín, I., Rasines, I., Gómez, M., Rodríguez, C., Martínez, P., Chereguini, O., 2014. Evolution of  
732 egg production and parental contribution in Senegalese sole, *Solea senegalensis*, during  
734 four consecutive spawning seasons. *Aquaculture* 424–425, 45–52.  
736 <https://doi.org/10.1016/j.aquaculture.2013.12.042>
- 734 Moccia, R.D., Munkittrick, K.R., 1987. Relationship between the fertilization of rainbow trout  
736 (*Salmo gairdneri*) eggs and the motility of spermatozoa. *Theriogenology* 27, 679–688.  
738 [https://doi.org/10.1016/0093-691X\(87\)90061-6](https://doi.org/10.1016/0093-691X(87)90061-6)
- 738 Morais, S., Aragão, C., Cabrita, E., Conceição, L.E.C., Constenla, M., Costas, B., Dias, J., Duncan,  
740 N., Engrola, S., Estevez, A., Gisbert, E., Mañanós, E., Valente, L.M.P., Yúfera, M., Dinis,  
742 M.T., 2016. New developments and biological insights into the farming of *Solea*  
744 *senegalensis* reinforcing its aquaculture potential. *Rev. Aquac.* 8, 227–263.  
746 <https://doi.org/10.1111/raq.12091>
- 742 Mylonas, C.C., Duncan, N.J., Asturiano, J.F., 2017. Hormonal manipulations for the enhancement  
744 of sperm production in cultured fish and evaluation of sperm quality. *Aquaculture* 472,  
746 21–44. <https://doi.org/10.1016/j.aquaculture.2016.04.021>
- 746 Norambuena, F., Estevez, A., Bell, G., Carazo, I., Duncan, N., 2012a. Proximate and fatty acid  
748 compositions in muscle, liver and gonads of wild versus cultured broodstock of  
750 Senegalese sole (*Solea senegalensis*). *Aquaculture* 356–357, 176–185.  
752 <https://doi.org/10.1016/j.aquaculture.2012.05.018>
- 750 Norambuena, F., Estévez, A., Mañanós, E., Bell, J.G., Carazo, I., Duncan, N., 2013a. Effects of  
752 graded levels of arachidonic acid on the reproductive physiology of Senegalese sole  
754 (*Solea senegalensis*): Fatty acid composition, prostaglandins and steroid levels in the  
756 blood of broodstock bred in captivity. *Gen. Comp. Endocrinol.* 191, 92–101.  
758 <https://doi.org/10.1016/j.ygcen.2013.06.006>
- 754 Norambuena, F., Estévez, A., Sánchez-Vázquez, F.J., Carazo, I., Duncan, N., 2012b. Self-selection  
756 of diets with different contents of arachidonic acid by Senegalese sole (*Solea*  
758 *senegalensis*) broodstock. *Aquaculture* 364–365, 198–205.  
760 <https://doi.org/10.1016/j.aquaculture.2012.08.016>
- 758 Norambuena, F., Mackenzie, S., Bell, J.G., Callol, A., Estévez, A., Duncan, N., 2012c. Prostaglandin  
760 (F and E, 2- and 3-series) production and cyclooxygenase (COX-2) gene expression of  
762 wild and cultured broodstock of senegalese sole (*Solea senegalensis*). *Gen. Comp.*  
764 *Endocrinol.* 177, 256–262. <https://doi.org/10.1016/j.ygcen.2012.04.009>
- 762 Norambuena, F., Morais, S., Estévez, A., Bell, J.G., Tocher, D.R., Navarro, J.C., Cerdà, J., Duncan,  
764 N., 2013b. Dietary modulation of arachidonic acid metabolism in senegalese sole (*Solea*  
766 *Senegalensis*) broodstock reared in captivity. *Aquaculture* 372–375, 80–88.  
768 <https://doi.org/10.1016/j.aquaculture.2012.10.035>
- 766 Parker, G.A., Pizzari, T., 2010. Sperm competition and ejaculate economics. *Biol. Rev.* 85, 897–  
768 934. <https://doi.org/10.1111/j.1469-185X.2010.00140.x>
- 768 Perchec Poupard, G., Paxion, C., Cosson, J., Jeulin, C., Fierville, F., Billard, R., 1998. Initiation of  
770 carp spermatozoa motility and early ATP reduction after milt contamination by urine.  
772 *Aquaculture* 160, 317–328. [https://doi.org/10.1016/S0044-8486\(97\)00301-3](https://doi.org/10.1016/S0044-8486(97)00301-3)
- 772 Prins, J., 2012. Product and Process Comparisons, in: Croarkin, C., Tobias, P. (Eds.),  
774 NIST/SEMATECH e-Engineering Statistics Handbook.  
<http://www.itl.nist.gov/div898/handbook/> <https://doi.org/10.18434/M32189>  
Accessed 06/08/2020

- 776 Ramos-Júdez, S., González, W., Dutto, G., Mylonas, C.C., Fauvel, C., Duncan, N., 2019. Gamete  
quality and management for in vitro fertilisation in meagre (*Argyrosomus regius*).  
Aquaculture 509, 227–235. <https://doi.org/10.1016/j.aquaculture.2019.05.033>
- 778 Rasines, I., Gómez, M., Martín, I., Rodríguez, C., Mañanós, E., Chereguini, O., 2013. Artificial  
fertilisation of cultured Senegalese sole (*Solea senegalensis*): Effects of the time of day  
780 of hormonal treatment on inducing ovulation. Aquaculture 392–395, 94–97.  
<https://doi.org/10.1016/j.aquaculture.2013.02.011>
- 782 Rasines, I., Gómez, M., Martín, I., Rodríguez, C., Mañanós, E., Chereguini, O., 2012. Artificial  
fertilization of Senegalese sole (*Solea senegalensis*): Hormone therapy administration  
784 methods, timing of ovulation and viability of eggs retained in the ovarian cavity.  
Aquaculture 326–329, 129–135. <https://doi.org/10.1016/j.aquaculture.2011.11.021>
- 786 Riesco, M.F., Valcarce, D.G., Martínez-Vázquez, J.M., Martín, I., Calderón-García, A.Á., Gonzalez-  
Nunez, V., Robles, V., 2019. Male reproductive dysfunction in *Solea senegalensis*: new  
788 insights into an unsolved question. Reprod. Fertil. Dev. 31, 1104.  
<https://doi.org/10.1071/RD18453>
- 790 Rizzo, E., Godinho, H.P., Sato, Y., 2003. Short-term storage of oocytes from the neotropical  
teleost fish *Prochilodus marginatus*. Theriogenology 60, 1059–1070.  
792 [https://doi.org/10.1016/S0093-691X\(03\)00108-0](https://doi.org/10.1016/S0093-691X(03)00108-0)
- Samarin, A.M., Amiri, B.M., Soltani, M., Mohammad, R., Kamali, A., Naghavi, M.R., 2011. Effects  
794 of storage duration and storage temperature on viability of stored ova of kutum (*Rutilus*  
*frisii* kutum) in ovarian fluid. Afr. J. Biotechnol. 10, 12309–12314.  
796 <https://doi.org/10.5897/AJB11.919>
- Sanches, E.A., Caneppele, D., Okawara, R.Y., Damasceno, D.Z., Bombardelli, R.A., Romagosa, E.,  
798 2016. Inseminating dose and water volume applied to the artificial fertilization of  
*Steindachneridion parahybae* (*Steindachner, 1877*) (Siluriformes: Pimelodidae):  
800 Brazilian endangered fish. Neotropical Ichthyol. 14, e140158.  
<https://doi.org/10.1590/1982-0224-20140158>
- 802 Sarosiek, B., Dryl, K., Krejszeff, S., Żarski, D., 2016. Characterization of pikeperch ( *Sander*  
*luciperca* ) milt collected with a syringe and a catheter. Aquaculture 450, 14–16.  
804 <https://doi.org/10.1016/j.aquaculture.2015.06.040>
- Stockley, P., Gage, M.J.G., Parker, G.A., Møller, A.P., 1997. Sperm Competition in Fishes: The  
806 Evolution of Testis Size and Ejaculate Characteristics. Am. Nat. 149, 933–954.  
<https://doi.org/10.1086/286031>
- 808 Suquet, M., Billard, R., Cosson, J., Normant, Y., Fauvel, C., 1995. Artificial insemination in turbot  
(*Scophthalmus maximus*): determination of the optimal sperm to egg ratio and time of  
810 gamete contact. Aquaculture 133, 83–90. [https://doi.org/10.1016/0044-8486\(94\)00395-5](https://doi.org/10.1016/0044-8486(94)00395-5)
- 812 Tatarenkov, A., Barreto, F., Winkelman, D.L., Avise, J.C., 2006. Genetic Monogamy in the Channel  
Catfish, *Ictalurus punctatus*, a Species with Uniparental Nest Guarding. Copeia 2006,  
814 735–741. [https://doi.org/10.1643/0045-8511\(2006\)6\[735:GMITCC\]2.0.CO;2](https://doi.org/10.1643/0045-8511(2006)6[735:GMITCC]2.0.CO;2)
- Yanagimachi, R., Harumi, T., Matsubara, H., Yan, W., Yuan, S., Hirohashi, N., Iida, T., Yamaha, E.,  
816 Arai, K., Matsubara, T., Andoh, T., Vines, C., Cherr, G.N., 2017. Chemical and physical  
guidance of fish spermatozoa into the egg through the micropyle. Biol. Reprod. 96, 780–  
818 799. <https://doi.org/10.1093/biolre/i0x015>
